# Supplementary material
Source: PubMed Central journal article supplement (PMC6041258)
Supplement: NIHMS931802-supplement-6.pdf [file NIHMS931802-supplement-6.pdf]

# Supplemental figure 5: Full western blot from the study.

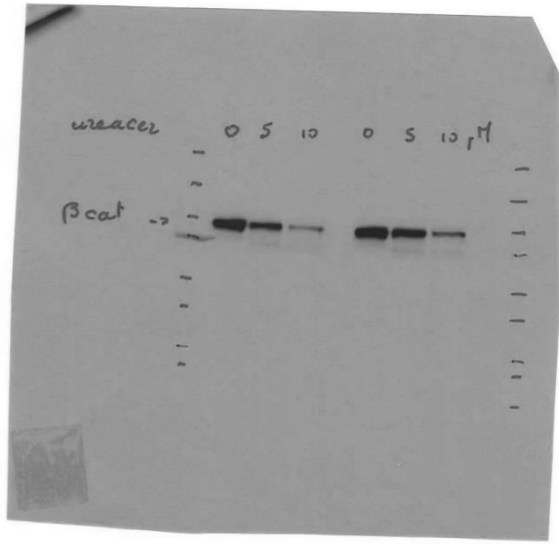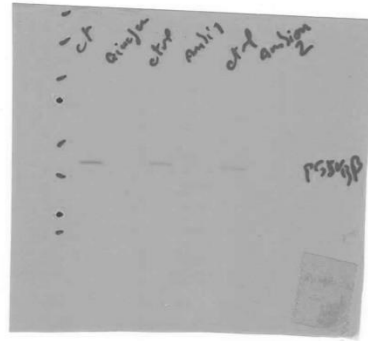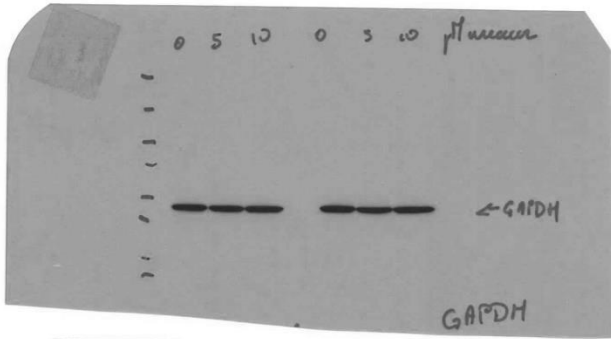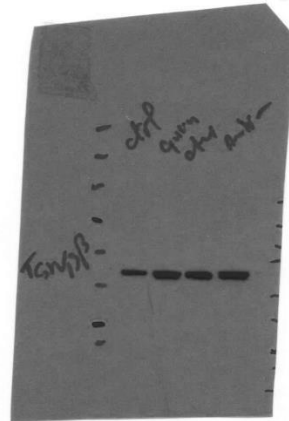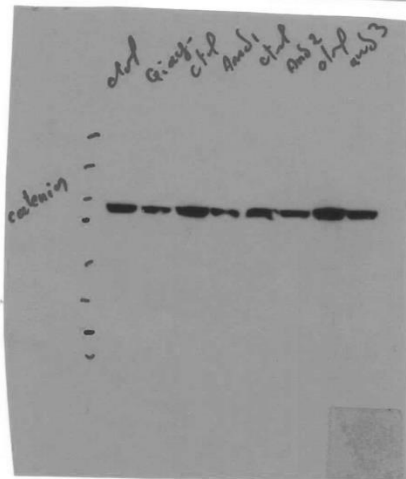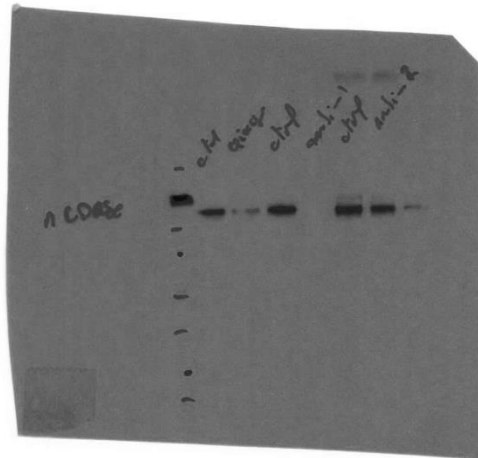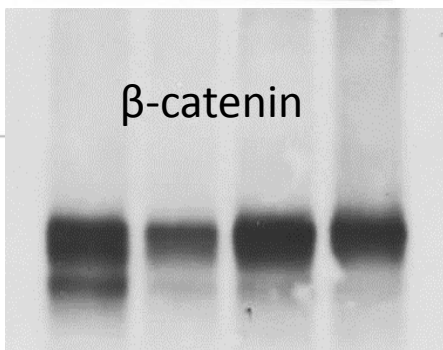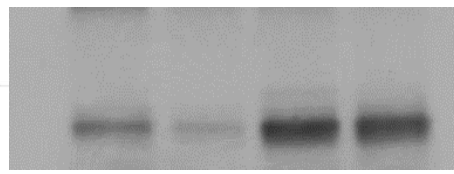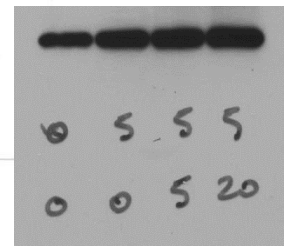

p<sup>ser9</sup>GSK3 $\beta$

GAPDH

# Supplemental figure 5: Full western blot from the study continued.

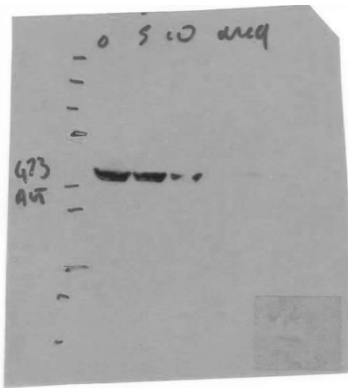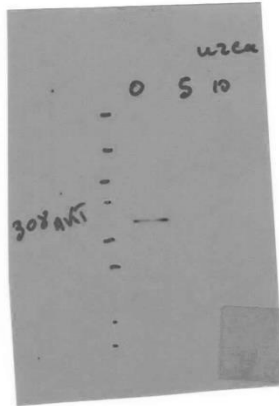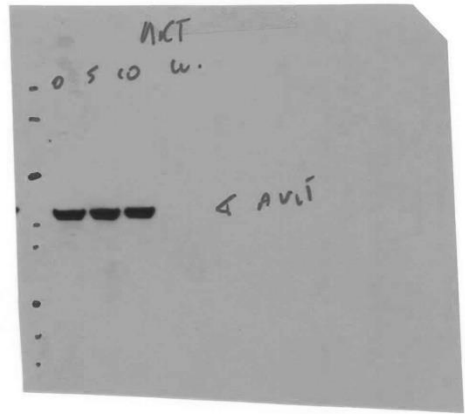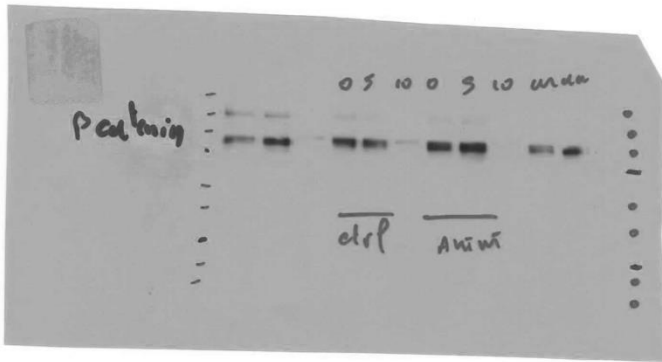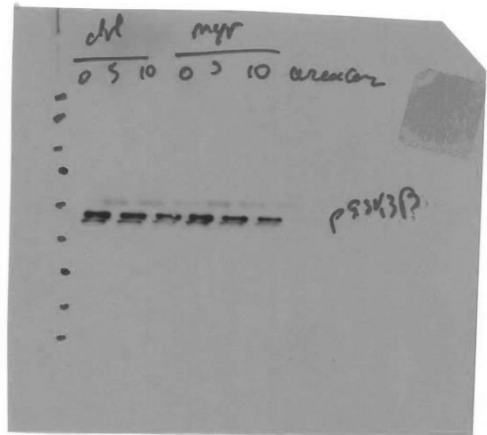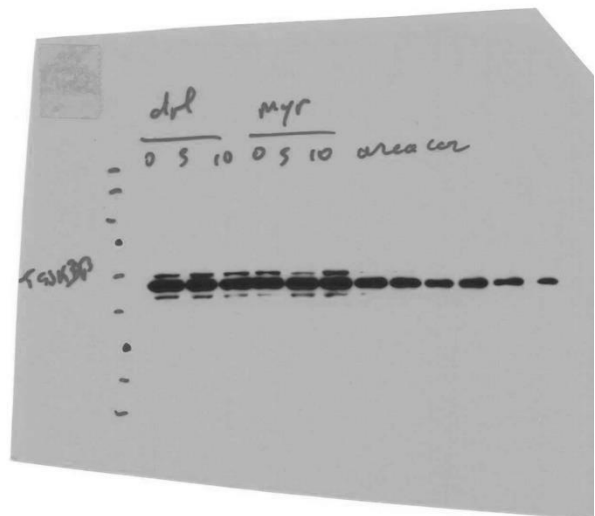

# Supplemental figure 5: Full western blot from the study continued.

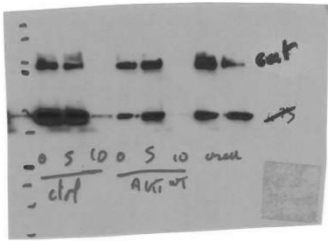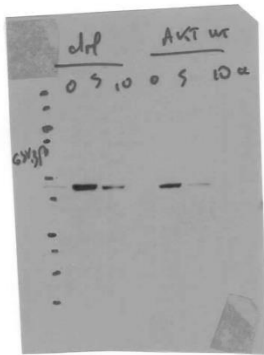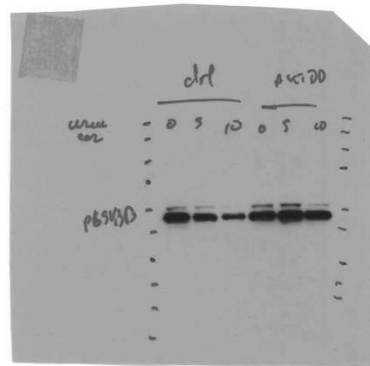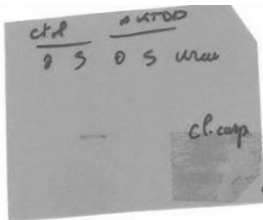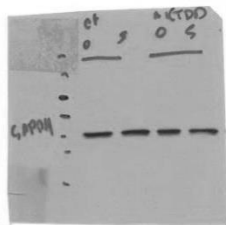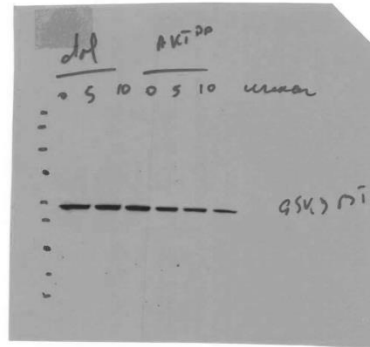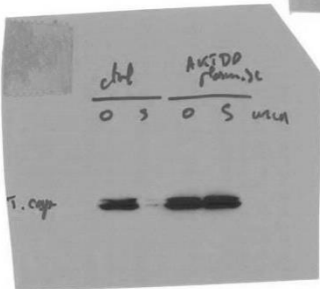

# Supplemental figure 5: Full western blot from the study continued.

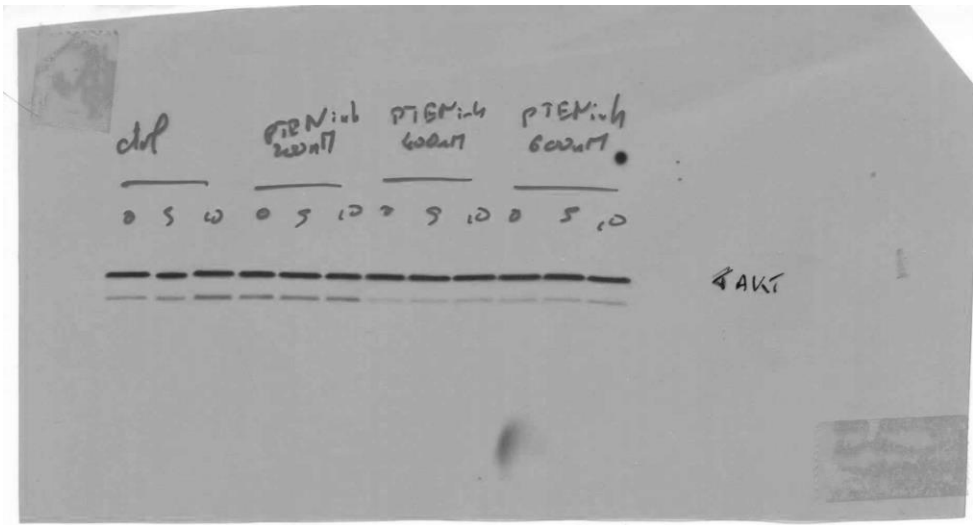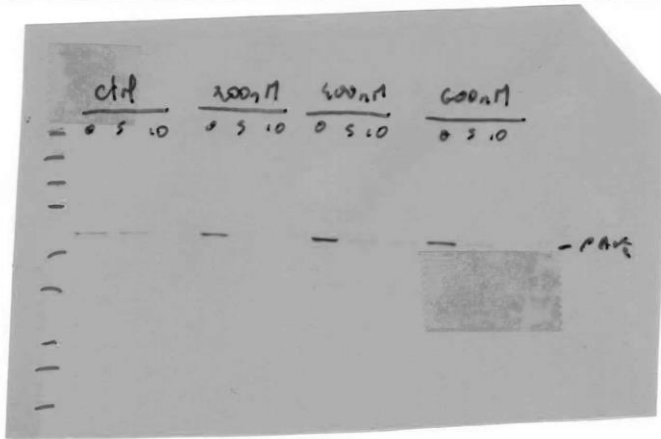

0 6 12 24 48 Time (hours)

$\beta$ -catenin

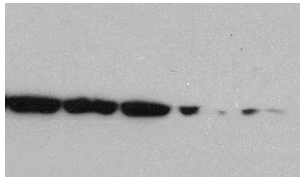

p<sup>ser9</sup>GSK3 $\beta$

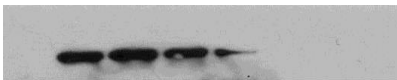

GSK3 $\beta$  TOTAL

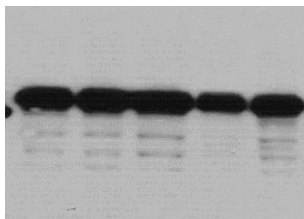

p<sup>ser473</sup>AKT

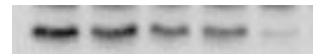

AKT TOTAL

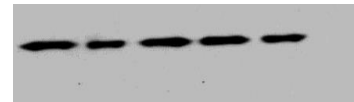

GAPDH

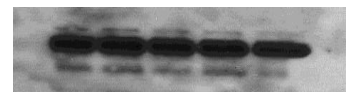

HT29

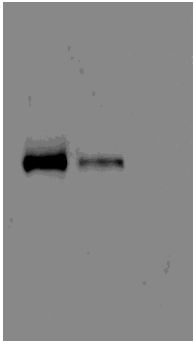

$\beta$ -catenin

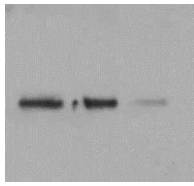

p<sup>ser9</sup>GSK3 $\beta$

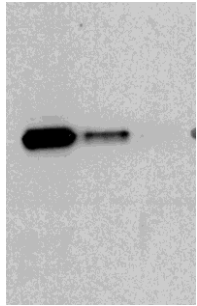

p<sup>ser473</sup>AKT

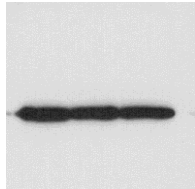

GAPDH

HCA-7

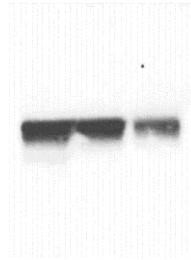

$\beta$ -catenin

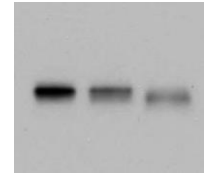

p<sup>ser9</sup>GSK3 $\beta$

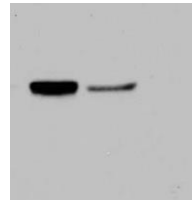

p<sup>ser473</sup>AKT

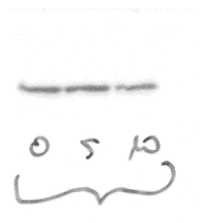

GAPDH

SW837

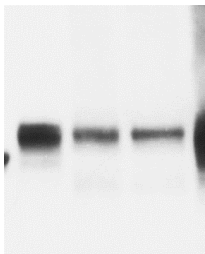

$\beta$ -catenin

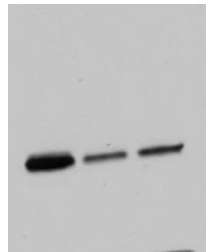

p<sup>ser9</sup>GSK3 $\beta$

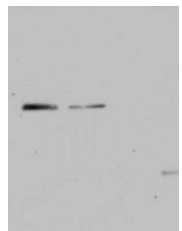

p<sup>ser473</sup>AKT

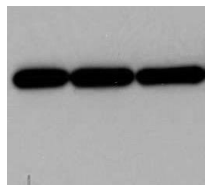

GAPDH

HCT116

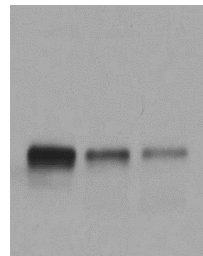

$\beta$ -catenin

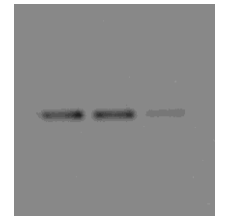

p<sup>ser9</sup>GSK3 $\beta$

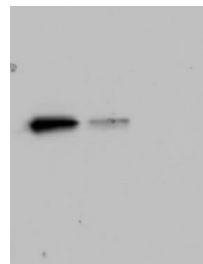

p<sup>ser473</sup>AKT

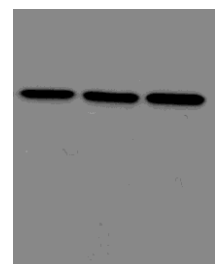

GAPDH

SW480

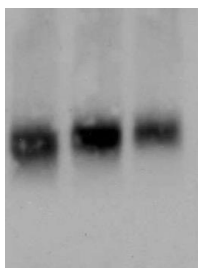

$\beta$ -catenin

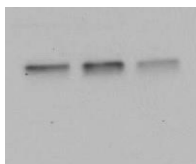

$p^{\text{ser}9}\text{GSK3}\beta$

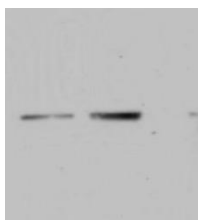

$p^{\text{ser}473}\text{AKT}$

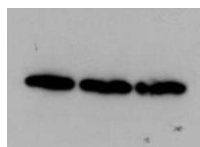

GAPDH

SW620

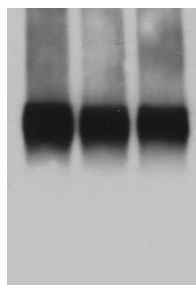

$\beta$ -catenin

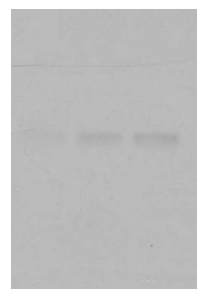

$p^{\text{ser}9}\text{GSK3}\beta$

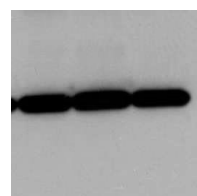

GAPDH

RKO

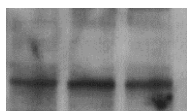

$\beta$ -catenin

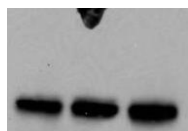

$p^{\text{ser}9}\text{GSK3}\beta$

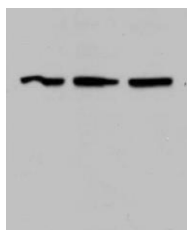

$p^{\text{ser}473}\text{AKT}$

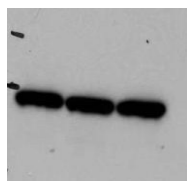

GAPDH

DLD-1

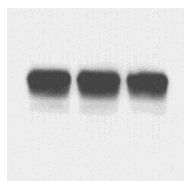

$\beta$ -catenin

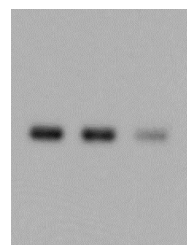

$p^{\text{ser}9}\text{GSK3}\beta$

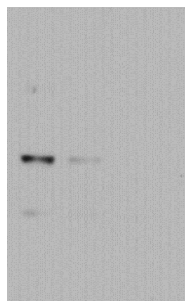

$p^{\text{ser}473}\text{AKT}$

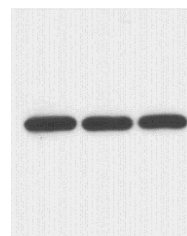

GAPDH

CaCo2

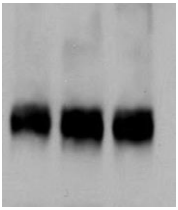

$\beta$ -catenin

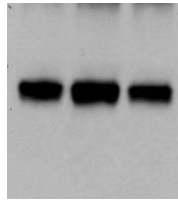

$p^{\text{ser}9}\text{GSK3}\beta$

T84

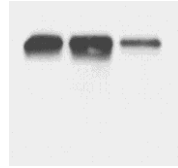

$\beta$ -catenin

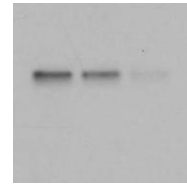

$p^{\text{ser}9}\text{GSK3}\beta$

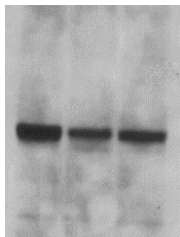

$p^{\text{ser}473}\text{AKT}$

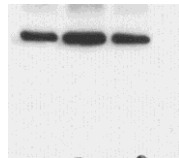

GAPDH

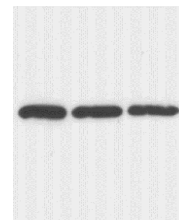

GAPDH

RIE-1

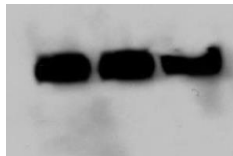

$\beta$ -catenin

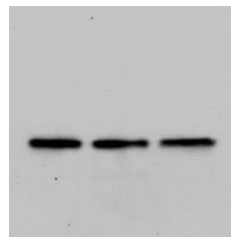

$p^{\text{ser}9}\text{GSK3}\beta$

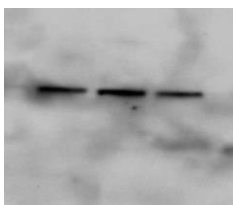

$p^{\text{ser}473}\text{AKT}$

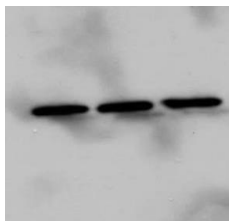

GAPDH
